# Supplementary material
Source: PubMed Central journal article supplement (PMC4139203)
Supplement: supp_M114.565994_jbc.M114.565994-1.pdf [file supp_M114.565994_jbc.M114.565994-1.pdf]

## SUPPLEMENTARY DATA

Supplementary Table 1. Primers used in this study.

| Name        |     | Sequence 5' -- 3'                                                              | Construct           |
|-------------|-----|--------------------------------------------------------------------------------|---------------------|
| M1          | (-) | CAGT GAA TTC AAG ATG TCC TTC GAG G                                             | mM8-myc             |
| K1104       | (-) | ACTG CTCGAG TAACTTGATGTATTAGC                                                  | mM8-myc             |
| D40         | (-) | ACTGGCGCGCATCACTGTCACTGTAGG                                                    | Δ41-48, Δ41-57      |
| F49         | (+) | CAGTGGCGGCTTTAAAAACGAGAATGTC                                                   | Δ41-48              |
| F49         | (-) | ACTGGCGCGCATTTCCTGAATAAAATTCACC                                                | Δ41-57, Δ49-57      |
| F58         | (+) | CAGTGGCGGCACCAGAGACTCCAAGGCC                                                   | Δ41-57              |
| M1 (mM2)    | (+) | CAGTGAATTCAAGATGGAGTCCTTGGACCGG                                                | (1-57) (1-76)/M2/M8 |
| 1-76 M2/M8  | (+) | TGTGTGTACTTCGTGGAAGACTCCAAGGCCATGG                                             | 1-76M2/M8           |
| 1-76 M2/M8  | (-) | CATGGCCTTGGAGTCTTCCACGAAAGTACACACTCC                                           | 1-76M2/M8           |
| 40-50mM2    | (-) | GATGTTCTCGGGAATCCATGAGCTAAGGTTACTGTCACTGTAGGACACG                              | 40-50 M2/M8         |
| 40-50mM2    | (+) | AACCTTAGCTCATGGATTCCCAGAAATCAAAAAACGAGAATGTGTC                                 | 40-50 M2/M8         |
| 50-60mM2    | (+) | AAGAAGAAGGAGTGTGTGTACTTCGTGGAAGACTCCAAGGCCATG G                                | 50-60 M2/M8         |
| 50-60mM2    | (-) | TCCACGAAGTACACACTCTTCTTCTTAAAAATTTGCCTGAATAAAA                                 | 50-60 M2/M8         |
| 5859VE      | (+) | CGAGAATGTGTCTTCTTTGTGCGAAGACTCCAAGGCC                                          | TR5859VE            |
| 5859VE      | (-) | GGCCTTGGAGTCTTCGACAAAAGAAGACACATTCTCG                                          | TR5859VE            |
| E4          | (-) | ACTGGCGCGCCTCGAAGGACATCTTGC                                                    | Δ5-39               |
| M1 (hM8)    | (+) | CAGT GAT ATCATGTCTTTCGGGCAGC                                                   | hM8-myc             |
| K1104 (hM8) | (-) | ACTGCTCGAGTAATTTGATTTTATTAGC                                                   | hM8-myc             |
| 1M (hM8b)   | (+) | CAGTGATATCATGAAATCCTTCCTTCCTGTCCACACCATCGTGCTTATCA<br>GGGAGAATGTGTGC AAGTGTGGC | hM8b                |
| D40         | (+) | CAGTGGCGGCGAATTTGGTGAATTTTATTTCAGG                                             | Δ5-39, Δ30-39       |
| M1 (mV1)    | (+) | CAGT GAATTCAAGATGGAGAAATGGGCTAGC                                               | 1-40 V1/M8          |
| 1-40 V1/M8  | (+) | CCAGCCAAGCCCCACATCTTGGTGAATTTTATTTCAGG                                         | 1-40 V1/M8          |
| 1-40 V1/M8  | (-) | CCTGAATAAAAATTCACCAAGATGTGGGGCTTGGCTGG                                         | 1-40 V1/M8          |
| M10HA       | (-) | AGCGTAGTCTGGGACGTCGTATGGGTACATGCTGAGCCTGGC                                     | 10-20 HA            |
| S20HA       | (+) | TACCCATACGACGTCACGACTACGCTAGCACCCCGACCC                                        | 10-20 HA            |
| R20HA       | (-) | AGCGTAGTCTGGGACGTCGTATGGGTACCTGCCCATAGTACC                                     | 20-30 HA            |
| R30HA       | (+) | TACCCATACGACGTCACGACTACGCTCGGAGCACAGACGTGTCC                                   | 20-30 HA            |
| L30HA       | (-) | AGCGTAGTCTGGGACGTCGTATGGGTACAGAGATACACTGGAGTAC                                 | 30-40 HA            |
| D40HA       | (+) | TACCCATACGACGTCACGACTACGCTGATTTGGTGAATTTTATTTCAGG                              | 30-40 HA            |
| 19 GRYPYD   | (-) | GTCGTATGGGTACCTGCCCATAGTACCATT                                                 | 19-25HA             |
| 26 YRYPYD   | (+) | AGGTACCCATACGACTACTCCAGTGTATCTCGG                                              | 19-25HA             |
| 24 LVPDYA   | (-) | AGCGTAGTCTGGGACCAGGGTCCGGGTGCTGCC 3'                                           | 24-30 HA            |
| 30 LVPDYA   | (+) | GTCCCAGACTACGCTCGGAGCACAGACGTGTCC                                              | 24-30 HA            |
| 22 YDVPD    | (-) | GTCTGGGACGTCGTACCCGGGTGCTGCCCAT                                                | 22-28 HA            |
| 28 YDVPD    | (+) | TACGACGTCACGACTATCTCGGAGCACAGACG                                               | 22-28 HA            |
| S26VS27P    | (+) | CGGACCCTGTACGTCCCCGTATCTCGGAGC                                                 | SS2627VP            |
| S26VS27P    | (-) | GCTCCGAGATACGGGGAGTACAGGGTCCG                                                  | SS2627VP            |
| S26V        | (+) | CGGACCCTGTACGTACGTATCTCGGAGC                                                   | S26V                |
| S26V        | (-) | GCTCCGAGATACACTGACGTACAGGGTCCG                                                 | S26V                |
| S26D        | (+) | CGGACCCTGTACGTACGTATCTCGGAGC                                                   | S26D                |
| S26D        | (-) | GCTCCGAGATACACTGTCGTACAGGGTCCG                                                 | S26D                |
| S26P        | (+) | CGGACCCTGTACCCAGTGTATCTCGGAGC                                                  | S26P                |
| S26P        | (-) | GCTCCGAGATACACTGGGGTACAGGGTCCG                                                 | S26P                |
| S27D        | (+) | CGGACCCTGTACTCCGATGTATCTCGGAGC                                                 | S27D                |
| S27D        | (-) | GCTCCGAGATACATCGGAGTACAGGGTCCG                                                 | S27D                |
| S27A        | (+) | ACCCTGTACTCCGCTGTATCTCGGAGC                                                    | S27A                |
| S27A        | (-) | GCTCCGAGATACAGCGGAGTACAGGGT                                                    | S27A                |
| 27P         | (+) | CGGACCCTGTACTCCCCGTATCTCGGAGC                                                  | 27P                 |
| 27P         | (-) | GCTCCGAGATACGGGGAGTACAGGGTCCG                                                  | 27P                 |
| 1cM8        | (+) | CAGTGATATCATGAGGCACCAAGAAATGG                                                  | 1-30 cM8/mM8        |
| 40cM8/mM8   | (-) | CCTGAATAAAAATTCACCAAAATCGCTATCATTGCACG                                         | 1-30 cM8/mM8        |
| 40cM8/mM8   | (+) | CGTGCAATGATAGCGATTTGGTGAATTTTATTTCAG G                                         | 1-30 cM8/mM8        |
| 57M2/40M8   | (+) | GCAGTGAGAAGCAAGAAAACCTTGGTGAATTTTATTTCAGG                                      | 1-57 M2/M8          |
| 57M2/40M8   | (-) | CCTGAATAAAAATTCACCAAGTTCCTTCTCTCACTGC                                          | 1-57 M2/M8          |
| L24         | (+) | CAGTGGCGGCTACTCCAGTGTATCTCGG                                                   | Δ12-24              |
| R11         | (-) | ACTGGCGGCCCCTCATGCTGAGCCTGGC                                                   | Δ12-24              |
| S29         | (-) | ACTGGCGGCGAGATACACTGGAGTACAGG                                                  | Δ30-39              |
